# Supplementary material
Source: Springer Nature journal article supplement (https://www.springermedizin.de/resource/supplementary/12889_2010_2817_MOESM5_ESM.pdf/9490028)
Supplement: MOESM5 [file 9490028]

Pattern Matrix (WAO 2003-2005)

|                                                         | Component |      |      |      |      |      |      |
|---------------------------------------------------------|-----------|------|------|------|------|------|------|
|                                                         | 1         | 2    | 3    | 4    | 5    | 6    | 7    |
| Climbing of stairs                                      | ,853      |      |      |      |      |      |      |
| Duration of continuous walking                          | ,849      |      |      |      |      |      |      |
| Total duration of walking                               | ,814      |      |      |      |      |      |      |
| Climbing                                                | ,718      |      |      |      |      |      |      |
| Total duration of standing                              | ,718      |      |      |      |      |      |      |
| Duration of continuous standing                         | ,710      |      |      |      |      |      |      |
| Kneeling or squatting                                   | ,697      |      |      |      |      |      | ,343 |
| Prolonged activities in a kneeling or squatting posture | ,693      |      |      |      |      |      |      |
| Handling objects like keys                              |           | ,872 |      |      |      |      |      |
| Handling objects like pens                              |           | ,868 |      |      |      |      |      |
| Handling objects like tweezers                          |           | ,840 |      |      |      |      |      |
| Handling objects like balls                             |           | ,837 |      |      |      |      |      |
| Handling cylindrical shapes                             |           | ,829 |      |      |      |      |      |
| Frequent stretching of the arm                          |           |      | ,756 |      |      |      |      |
| Frequent handling of light objects                      |           |      | ,659 |      |      |      |      |
| Lifting and carrying                                    | ,336      |      | ,603 |      |      |      |      |
| Prolonged activities above the shoulder height          |           |      | ,589 |      |      |      |      |
| Pushing and pulling                                     | ,356      |      | ,541 |      |      |      |      |
| Frequent handling of heavy loads                        |           |      | ,541 |      |      |      |      |
| Twisting movements with hand and arm                    |           |      | ,500 |      |      | ,377 |      |
| Duration of continuous sitting                          |           |      |      | ,813 |      |      |      |
| Total duration of sitting                               |           |      |      | ,797 |      |      |      |
| Changing posture                                        |           |      |      | ,605 |      |      |      |
| Bending                                                 |           |      |      | ,537 |      |      | ,423 |
| Frequent bending                                        |           |      | ,322 | ,496 |      |      |      |
| Prolonged activities in a bended or turned posture      |           |      |      | ,486 |      |      |      |
| Head movements                                          |           |      |      |      | ,864 |      |      |
| Keeping one's head in a fixed position for some time    |           |      |      |      | ,857 |      |      |
| Repetitive movements of hands and fingers               |           |      |      |      |      | ,795 |      |
| Precision movements of hands and fingers                |           |      |      |      |      | ,710 |      |
| Squeezing and gripping strength                         |           |      |      |      |      | ,614 |      |
| Total duration of working with keyboard and mouse       |           |      | ,438 |      |      | ,468 |      |
| Operate a keyboard and handle a mouse                   |           |      |      |      |      | ,399 |      |
| Touch                                                   |           |      |      |      |      | ,378 |      |
| Turning                                                 |           |      |      | ,467 |      |      | ,526 |
| Stretching of the arm                                   |           |      | ,394 |      |      |      | ,469 |

Extraction Method: Principal Component Analysis.

Rotation Method: Oblimin with Kaiser Normalization.

KMO: 0.916; MSA > 0.759

Cumulative percentage of variance explained (seven factors): 61.1%
